# Supplementary material
Source: PubMed Central journal article supplement (PMC3314915)

**A**

**Newborn**

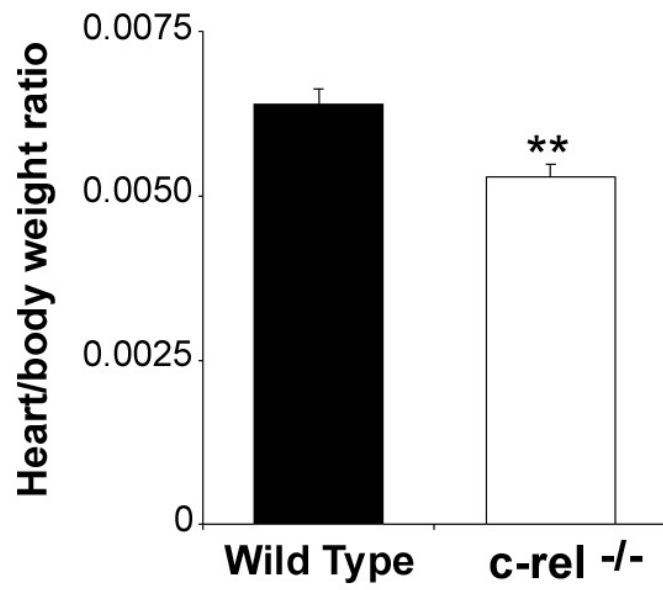

**B**

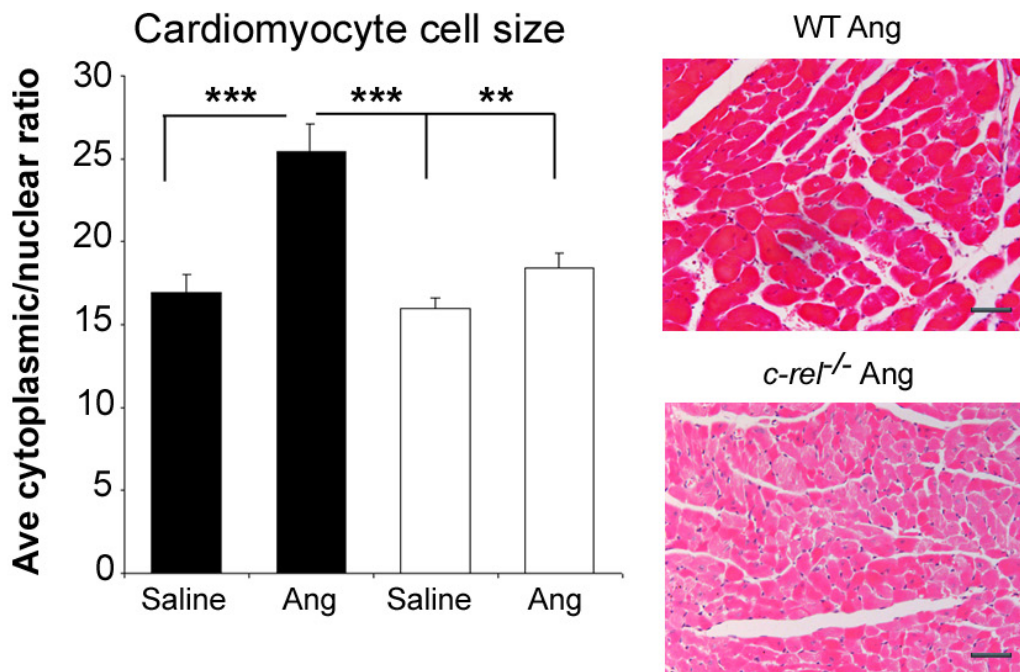

Supplement: mmc1.pdf [file mmc1.pdf]

**A**

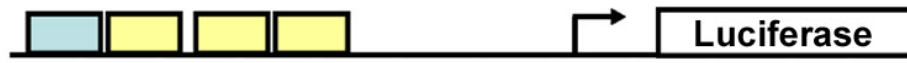

**GATA4 promoter**

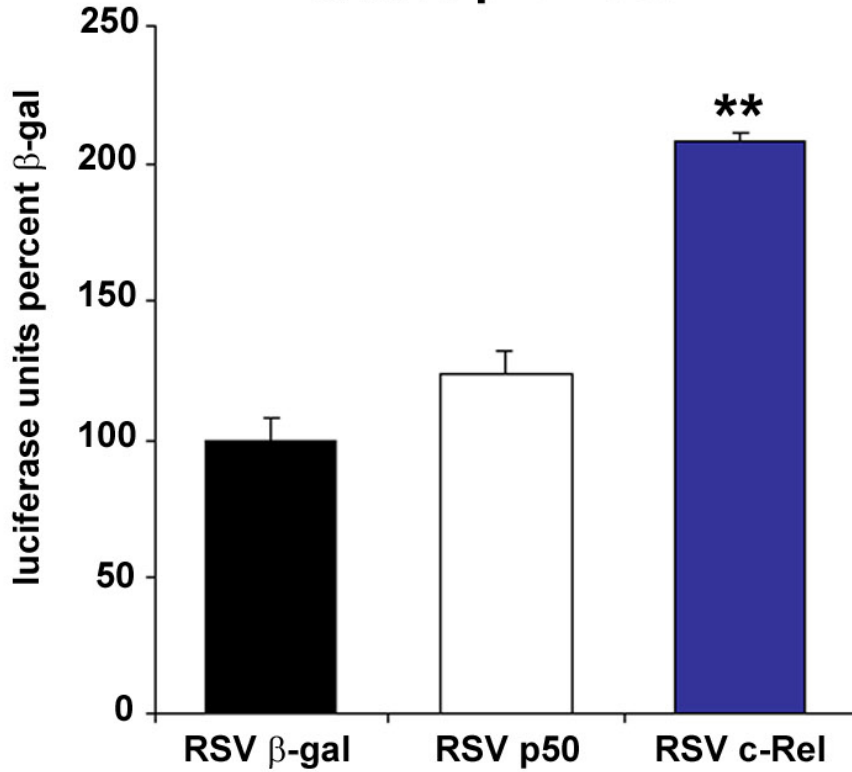

**B**

**TGF $\beta$ 1  
exon1 - intron 1**

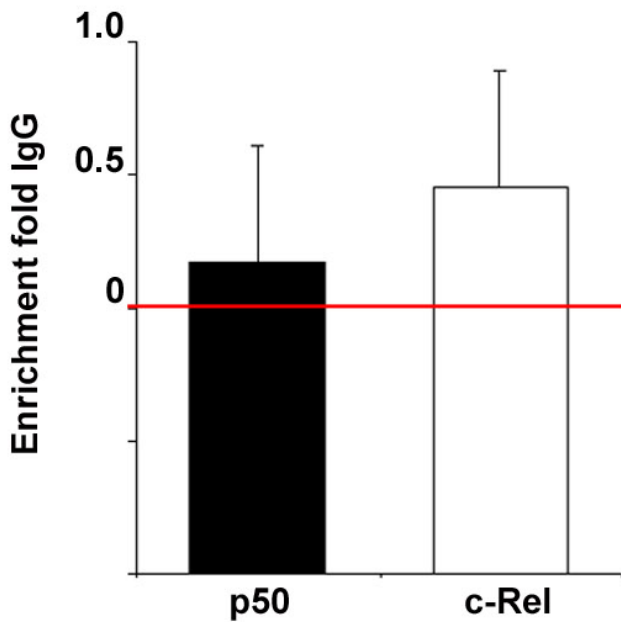

**PPAR $\gamma$   
exon1 - intron 1**

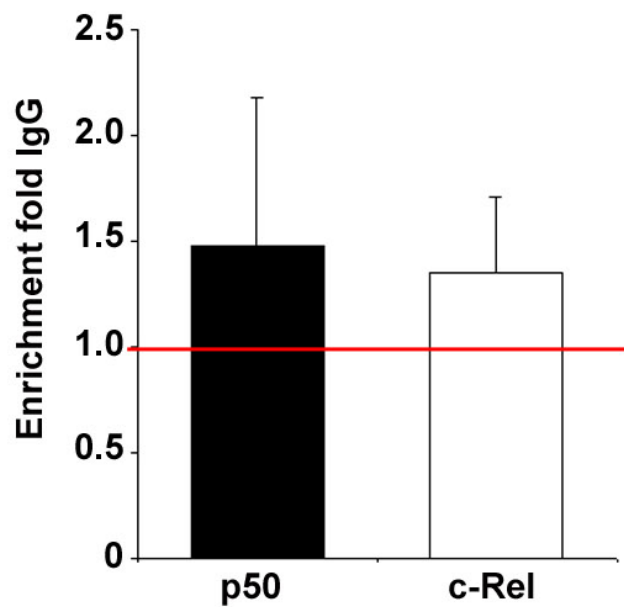

Supplement: mmc2.pdf [file mmc2.pdf]

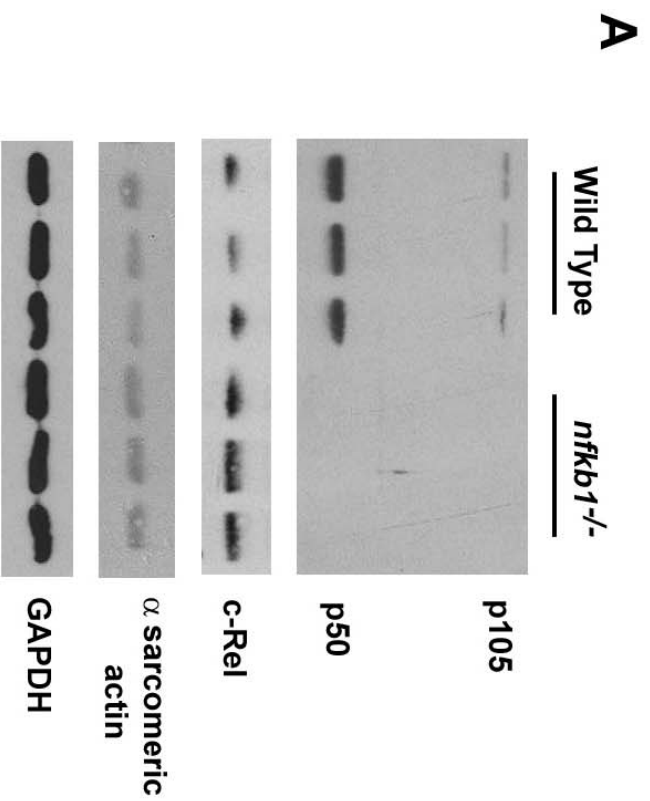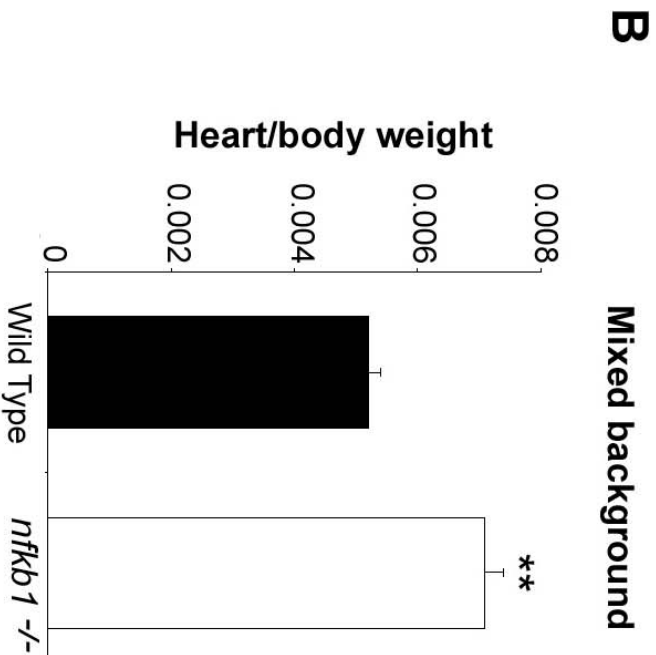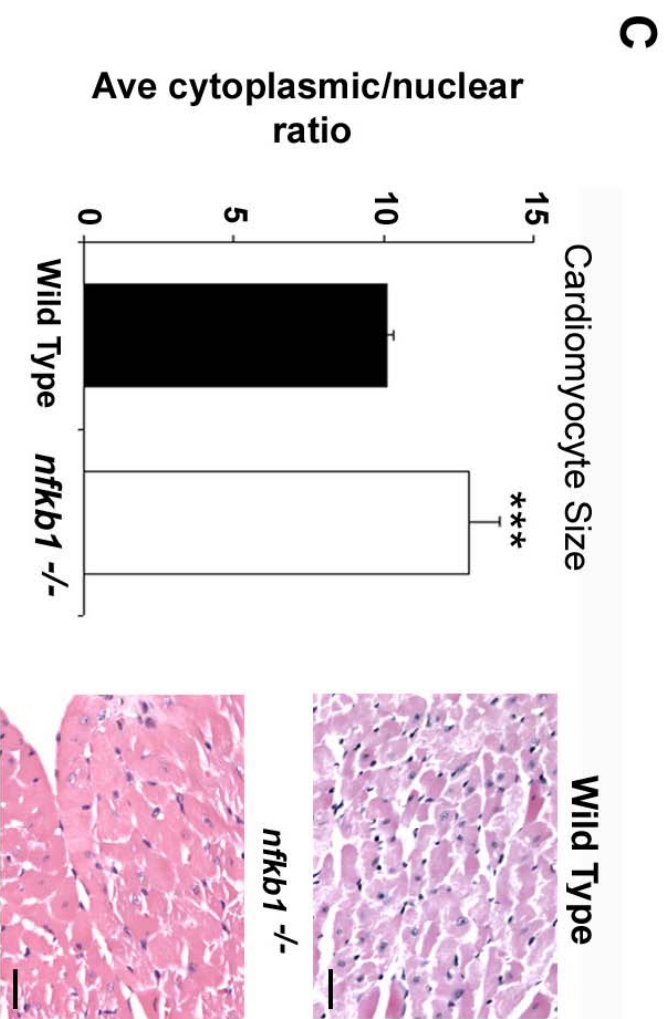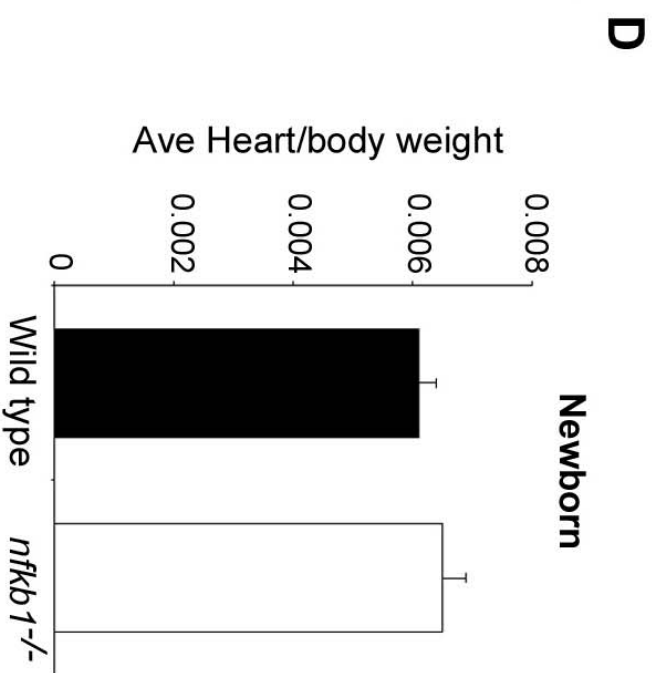

Supplement: mmc3.pdf [file mmc3.pdf]
